# Supplementary material for: Regulation of the Boundaries of Accessible Chromatin
Source: PubMed Central journal article supplement (PMC3772044; doi:10.1371/journal.pgen.1003778), 2013-09-12

Figure S2

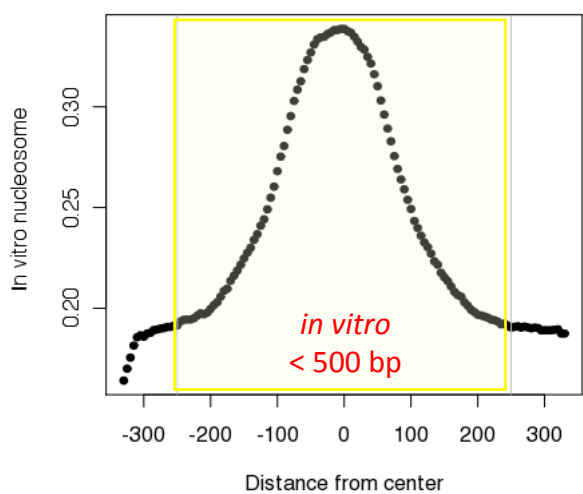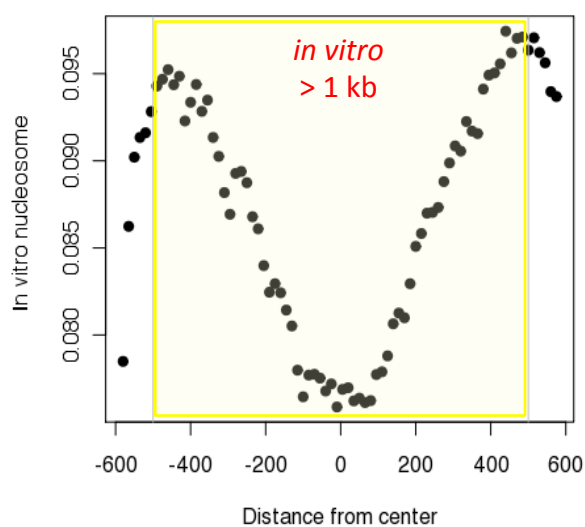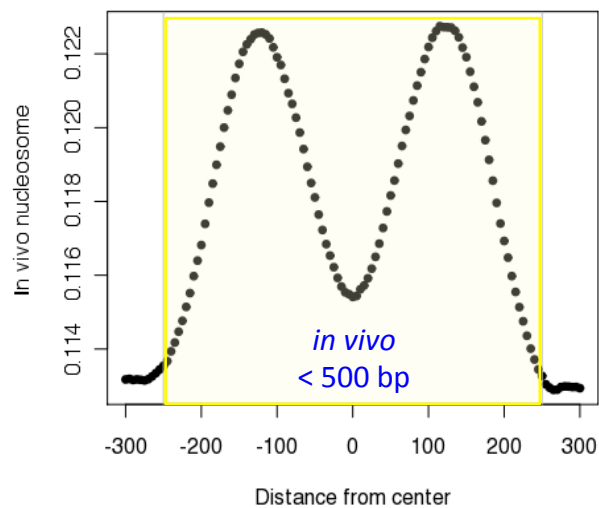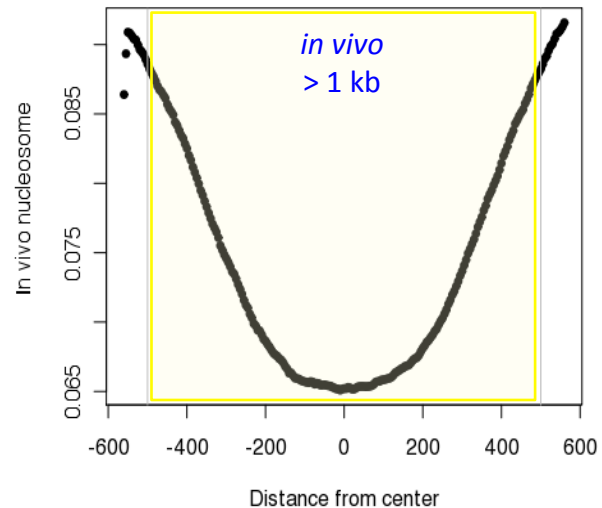

Supplement: pgen.1003778.s002.pdf [file pgen.1003778.s002.pdf]
