# Supplementary material for: Regulation of the Boundaries of Accessible Chromatin
Source: PubMed Central journal article supplement (PMC3772044; doi:10.1371/journal.pgen.1003778), 2013-09-12
Supplement: pgen.1003778.s006.pdf [file pgen.1003778.s006.pdf]

Table S1

| Yeast        | <i>In vivo</i> nucleosome | <i>In vitro</i> nucleosome |
|--------------|---------------------------|----------------------------|
| Promoter     | 25.6%                     | 60.8%                      |
| Non-promoter | 29.1%                     | 78.1%                      |

| Human        | <i>In vivo</i> nucleosome | <i>In vitro</i> nucleosome |
|--------------|---------------------------|----------------------------|
| Promoter     | 6.3%                      | 28.7%                      |
| Non-promoter | 11.2%                     | 25.1%                      |
