# Supplementary material for: Regulation of the Boundaries of Accessible Chromatin
Source: PubMed Central journal article supplement (PMC3772044; doi:10.1371/journal.pgen.1003778), 2013-09-12
Supplement: pgen.1003778.s007.pdf [file pgen.1003778.s007.pdf]

Table S2

| Gene name                                     | Description                                                                                                                                | Number of linkages |
|-----------------------------------------------|--------------------------------------------------------------------------------------------------------------------------------------------|--------------------|
| <i>IES6</i>                                   | protein that associates with the INO80 chromatin remodeling complex, which is involved in nucleosome spacing and mobilization              | 41                 |
| <i>MCM3</i> ,<br><i>MCM5</i> ,<br><i>MCM6</i> | proteins involved in DNA replication; components of the Mcm2-7 complex that binds chromatin                                                | 28, 5, 4           |
| <i>SRB2</i>                                   | general transcription factor; subunit of the RNA pol II mediator complex                                                                   | 16                 |
| <i>YAP7</i>                                   | basic leucine zipper (bZIP) transcription factor                                                                                           | 12                 |
| <i>PDR8</i>                                   | transcription factor                                                                                                                       | 7                  |
| <i>SPT16</i>                                  | subunit of the FACT complex (Spt16p-Pob3p), which interacts with nucleosomes in multiple ways                                              | 6                  |
| <i>HOS2</i>                                   | histone deacetylase required for gene activation; subunit of the Set3 complex                                                              | 6                  |
| <i>ESC8</i>                                   | protein involved in chromatin silencing; interacts with Sir2p and with the Gal11p, which is a component of the RNA pol II mediator complex | 6                  |
| <i>PUT3</i>                                   | transcriptional activator                                                                                                                  | 6                  |
| <i>STB1</i>                                   | cell-cycle-regulated transcription factor                                                                                                  | 6                  |
| <i>MIG2</i>                                   | transcription factor containing zinc fingers                                                                                               | 6                  |
| <i>GAT4</i>                                   | transcription factor containing GATA family zinc finger motifs                                                                             | 6                  |
