# Supplementary material for: Regulation of the Boundaries of Accessible Chromatin
Source: PubMed Central journal article supplement (PMC3772044; doi:10.1371/journal.pgen.1003778), 2013-09-12
Supplement: pgen.1003778.s008.pdf [file pgen.1003778.s008.pdf]

Table S3

| <i>Data</i>                    | <i>Sample</i>                | <i>Source</i>                                                                                                                                               |
|--------------------------------|------------------------------|-------------------------------------------------------------------------------------------------------------------------------------------------------------|
| Open chromatin (DHS+FAIRE)     | GM12878<br>Human             | UCSC ENCODE<br>(Open Chromatin Synthesis Track)                                                                                                             |
| Open chromatin (FAIRE)         | BYxRM 96<br>strains<br>Yeast | GEO database<br>(GSE33466)                                                                                                                                  |
| In vivo nucleosome             | GM12878<br>Human             | UCSC ENCODE<br>(Nucleosome Position Track)                                                                                                                  |
| In vivo nucleosome             | BY strain<br>Yeast           | GEO database<br>(GSE34923)                                                                                                                                  |
| In vitro nucleosome            | Human                        | Nature 474: 516-520, 2011                                                                                                                                   |
| In vitro nucleosome            | Yeast                        | Nature 458: 362-366, 2009                                                                                                                                   |
| Histone modification           | GM12878<br>Human             | UCSC ENCODE<br>(Histone Modification Tracks)                                                                                                                |
| TF binding                     | GM12878<br>Human             | UCSC ENCODE<br>(Transcription Factor Binding Tracks)                                                                                                        |
| In vivo nucleosome             | CD4 T cell<br>Human          | <a href="http://dir.nhlbi.nih.gov/papers/lmi/epigenomes/hgtcellnucleosomes.aspx">http://dir.nhlbi.nih.gov/papers/lmi/epigenomes/hgtcellnucleosomes.aspx</a> |
| Histone acetylation            | CD4 T cell<br>Human          | <a href="http://dir.nhlbi.nih.gov/papers/lmi/epigenomes/hgtcellacetylation.aspx">http://dir.nhlbi.nih.gov/papers/lmi/epigenomes/hgtcellacetylation.aspx</a> |
| Histone methylation /<br>H2A.Z | CD4 T cell<br>Human          | <a href="http://dir.nhlbi.nih.gov/papers/lmi/epigenomes/hgtcell.aspx">http://dir.nhlbi.nih.gov/papers/lmi/epigenomes/hgtcell.aspx</a>                       |
